# Supplementary material for: On the Nature of Infrastructural-Residual-Space
Source: Research Square preprint supplement (doi:10.21203/rs.3.rs-6694057/v1), 2025-06-09
Supplement: Supplementary file 1 [file f0f01ec969c94d3a8c2b6c77.pdf]

Article visual abstract

VISUAL ABSTRACT OF MANUSCRIPT

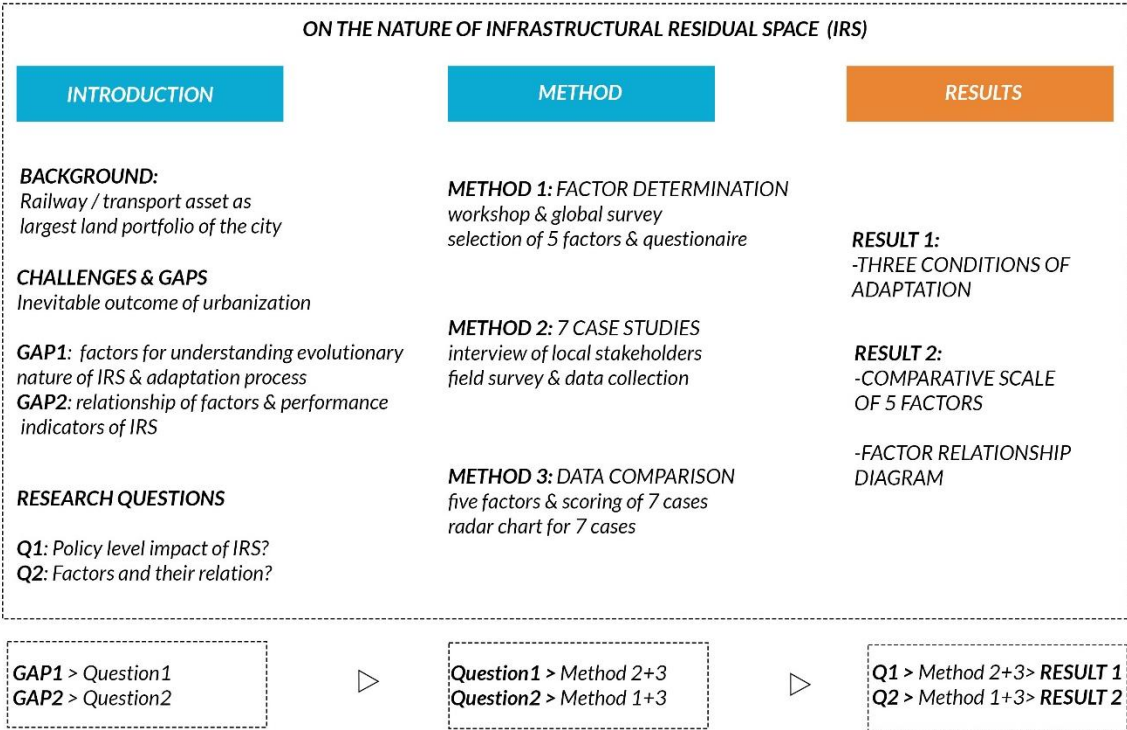

Supplementary figures and charts

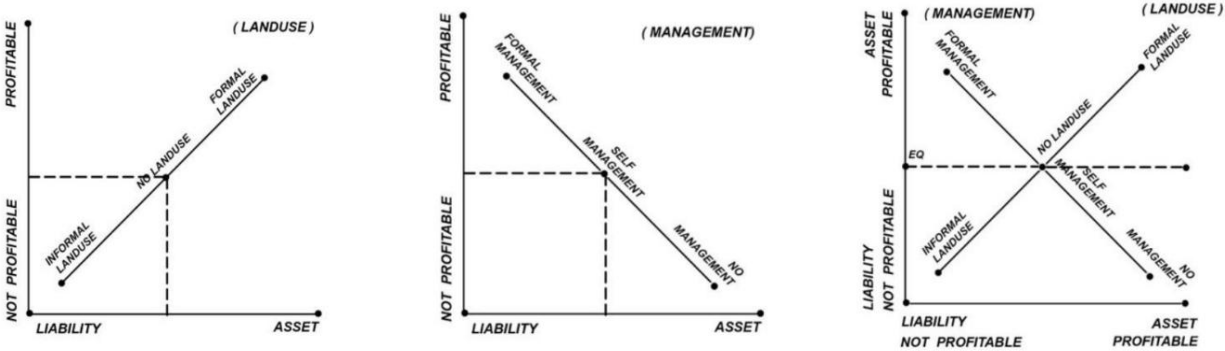

**Supplementary Figure 01:** Relationship Between Land Use, Management, and Asset-Liability in IRS: Supplementary figure 01 illustrates how land use and management type independently and collectively influence perceptions of profitability and asset-liability within infrastructural residual spaces (IRS). The first two diagrams separately highlight land use and management correlations, while the third diagram synthesizes both dimensions, clearly indicating that a shift towards formalized land use and management enhances asset valuation and profitability, whereas informal or absent management increases liability and decreases profitability.

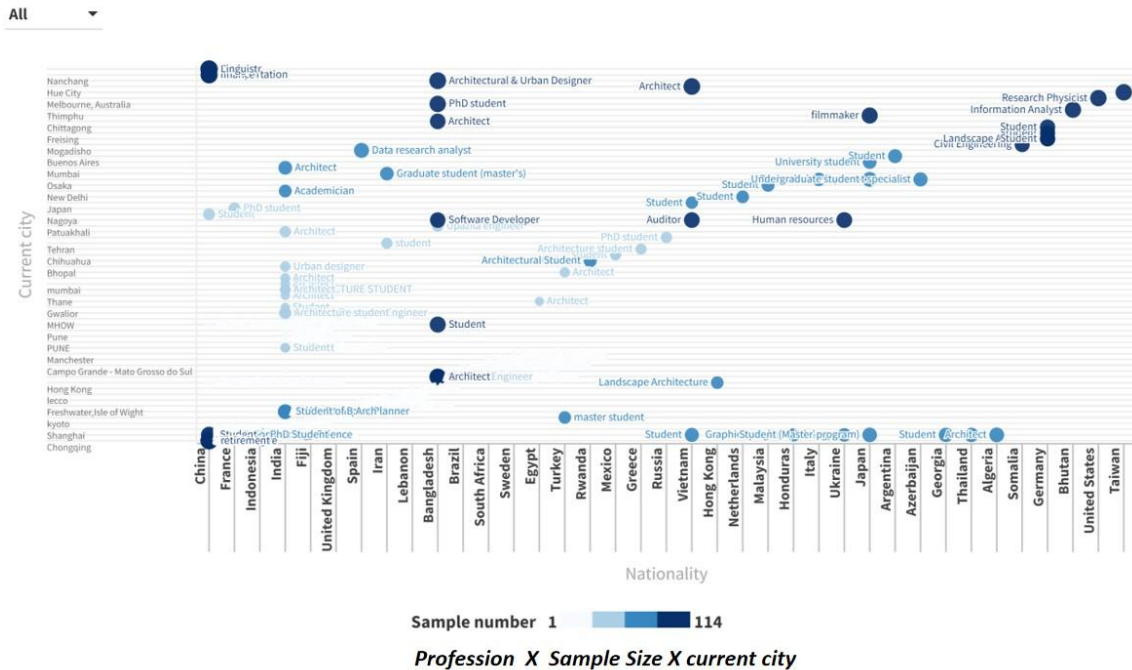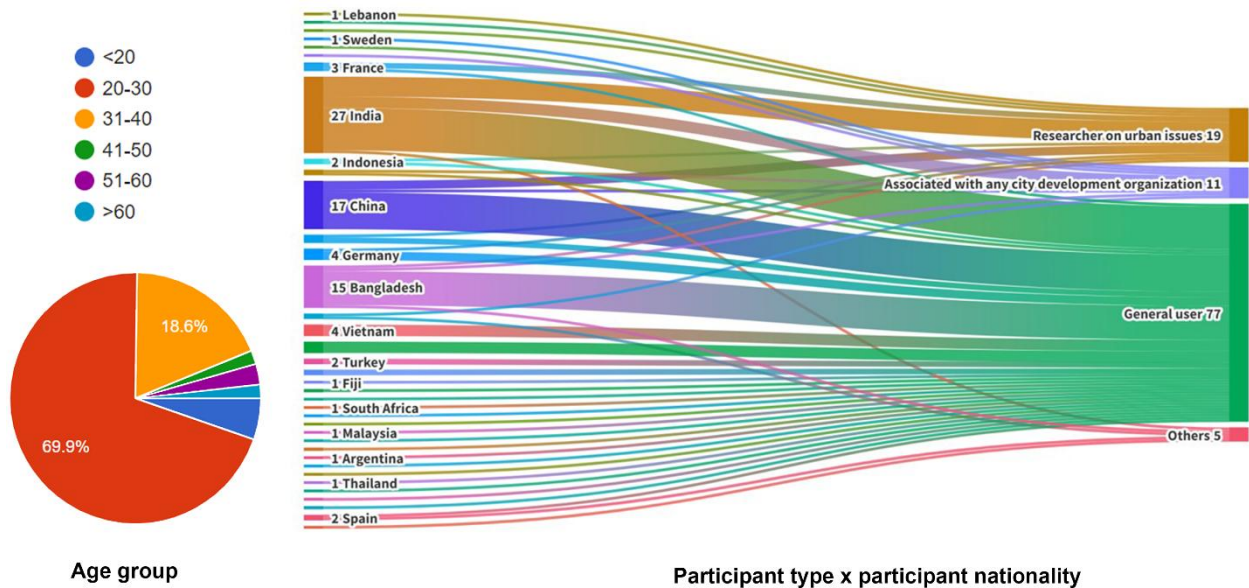

**Supplementary Figure 02 a:** profession x sample size x current city, participant age group x nationality

This figure illustrates the demographic and professional diversity of the global survey respondents (n=115) across 37 countries. (a) shows a cross-tabulation of participants' professions, current cities, and nationalities, highlighting significant representation from architecture, planning, and research backgrounds. (b) combines age distribution and participant type with nationality, revealing that 69.9% of respondents were under 30, and the majority identified as general users, followed by researchers and professionals associated with urban development. These insights emphasize the broad geographic and disciplinary scope underpinning the study's public perception data.

| Management Activities           | Lessons learned                                                                                                                                                                                                                                                                                                                                                                                                                                                                                                                                                                                                                                                                                                                                                                                                                                                                                          | Research Question                                                                                                                              | Key factors                                                                                                                                                                                            |
|---------------------------------|----------------------------------------------------------------------------------------------------------------------------------------------------------------------------------------------------------------------------------------------------------------------------------------------------------------------------------------------------------------------------------------------------------------------------------------------------------------------------------------------------------------------------------------------------------------------------------------------------------------------------------------------------------------------------------------------------------------------------------------------------------------------------------------------------------------------------------------------------------------------------------------------------------|------------------------------------------------------------------------------------------------------------------------------------------------|--------------------------------------------------------------------------------------------------------------------------------------------------------------------------------------------------------|
| Symposium 2022 + Symposium 2023 | <ol style="list-style-type: none"> <li>1. Infra-residual spaces become activated when there are social, commercial, or political values surrounding an infrastructure.</li> <li>2. Socio-cultural histories play an important role in determining the land use of an infra-residual space.</li> <li>3. Definitions of infra-adaptations vary from stakeholder to stakeholder. Policies that enable a transparent multi-stakeholder design approach can bring sustainable infra-residual spatial management.</li> <li>4. Infra-adaptations are a worldwide phenomenon.</li> <li>5. Public-private partnerships are key ways to finance infrastructural projects, and their commercial benefits are taken into consideration when determining land use.</li> <li>6. The image of an infrastructural adaptation depends on the aspirations of a specific urban setup and what it aims to become.</li> </ol> | <p>How social practise adapt with physical infrastructure?</p> <p>Q.A: Factors of adaptation ?</p> <p>Q.B: Relationship among the factors?</p> | <div> <div>Landuse Management</div> <div>Functionality of Infrastructure</div> <div>Accessibility of user group</div> <div>Tenant/User Profitability</div> <div>Infrastructural Liability</div> </div> |
| Global Public Suvery            | <ol style="list-style-type: none"> <li>7. Common users prefer publicly accessible and safe spaces for infra-residual placemaking.</li> <li>8. Formal management and planning of infra-residual spaces are more preferred by common users over informal setups.</li> </ol>                                                                                                                                                                                                                                                                                                                                                                                                                                                                                                                                                                                                                                |                                                                                                                                                |                                                                                                                                                                                                        |

## Supplementary Figure 02 b: Derivation of Key IRS Adaptation Factors from Participatory Activities

This diagram summarizes insights from two key data sources: international symposiums (2022–2023) and a global public survey. Lessons learned from multi-stakeholder dialogues and public preferences informed the development of five core parameters for evaluating the adaptation of Infrastructural Residual Spaces (IRS): Land Use Management, Functionality of Infrastructure, Accessibility of User Group, Tenant/User Profitability, and Infrastructural Liability. These factors are used to answer the central research question: *How does social practice adapt to physical infrastructure?*, and inform the comparative evaluation framework used throughout the study.

## IRS EVOLUTION AND ADAPTATION THROUGH **TIME** (7 CASES)

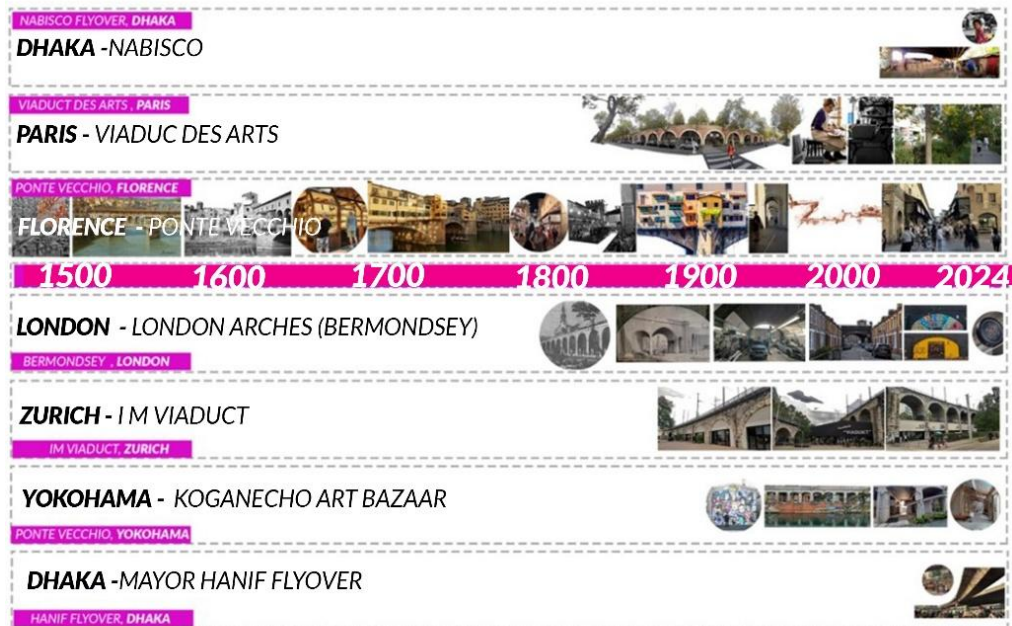

39

### 40 **Supplementary Figure 03. Timeline of IRS Adaptation Across Seven Global Cities**

41 This figure presents a comparative timeline of infrastructural-residual space (IRS) adaptation across seven global  
 42 cities—Florence, London, Zurich, Paris, Yokohama, Dhaka, and, observationally, Kyoto. Each city represents a  
 43 distinct historical phase in the evolution and continued use of IRS, ranging from the earliest examples of under-  
 44 infrastructure spaces to their ongoing adaptation in contemporary urban contexts.



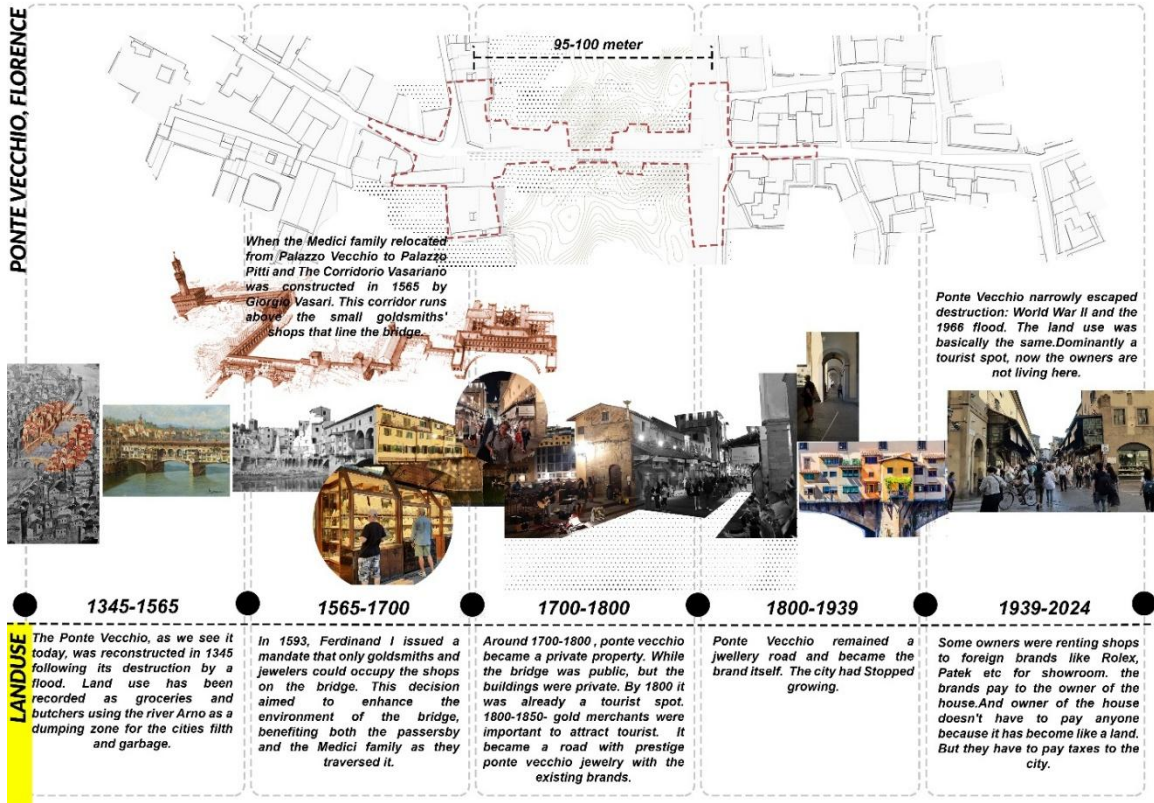

45

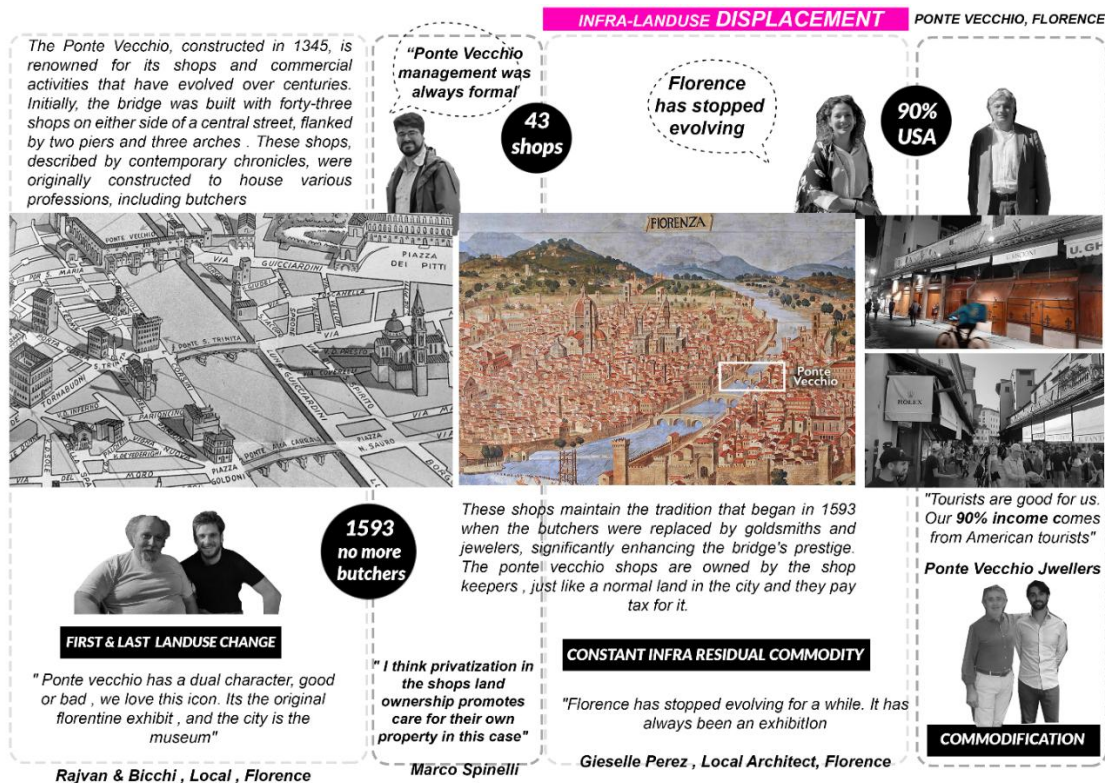

46

47

48

Supplementary Figure 04: Land use evolution in IRS of Ponte Vecchio, Florence, Transcribed Interviews are available upon request.



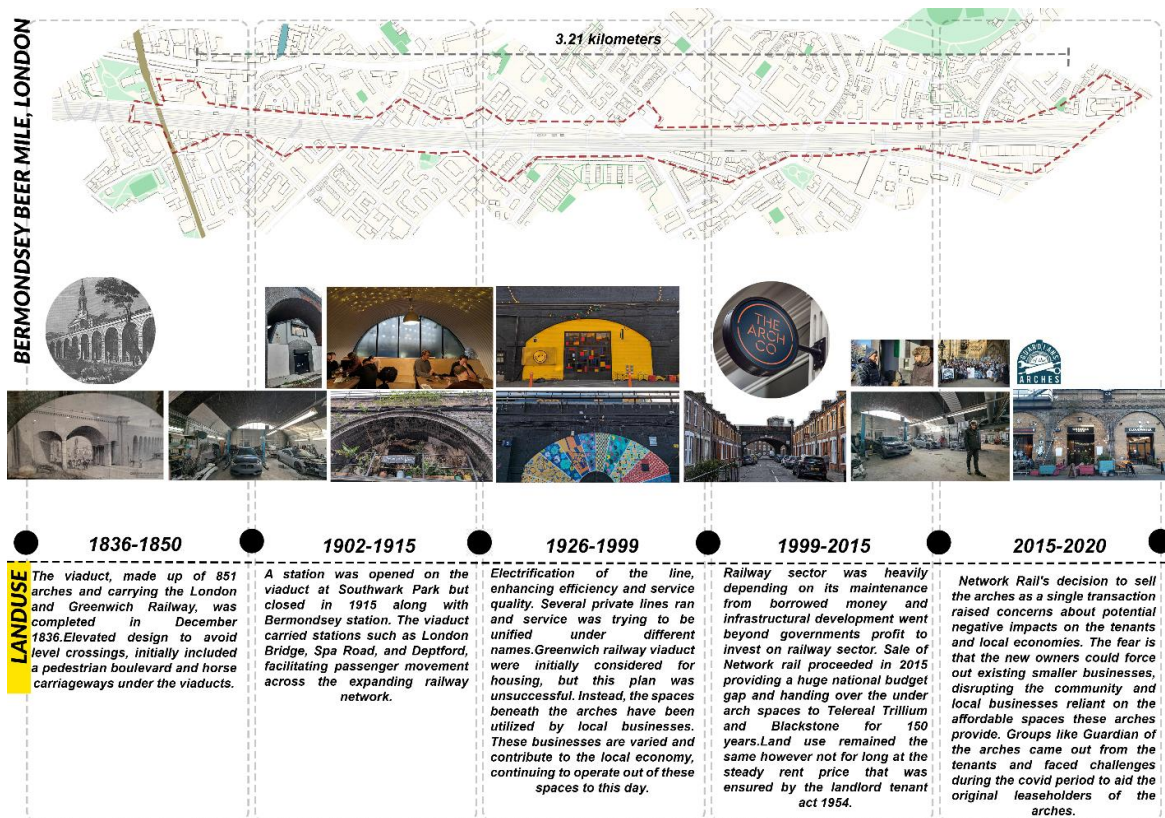

49

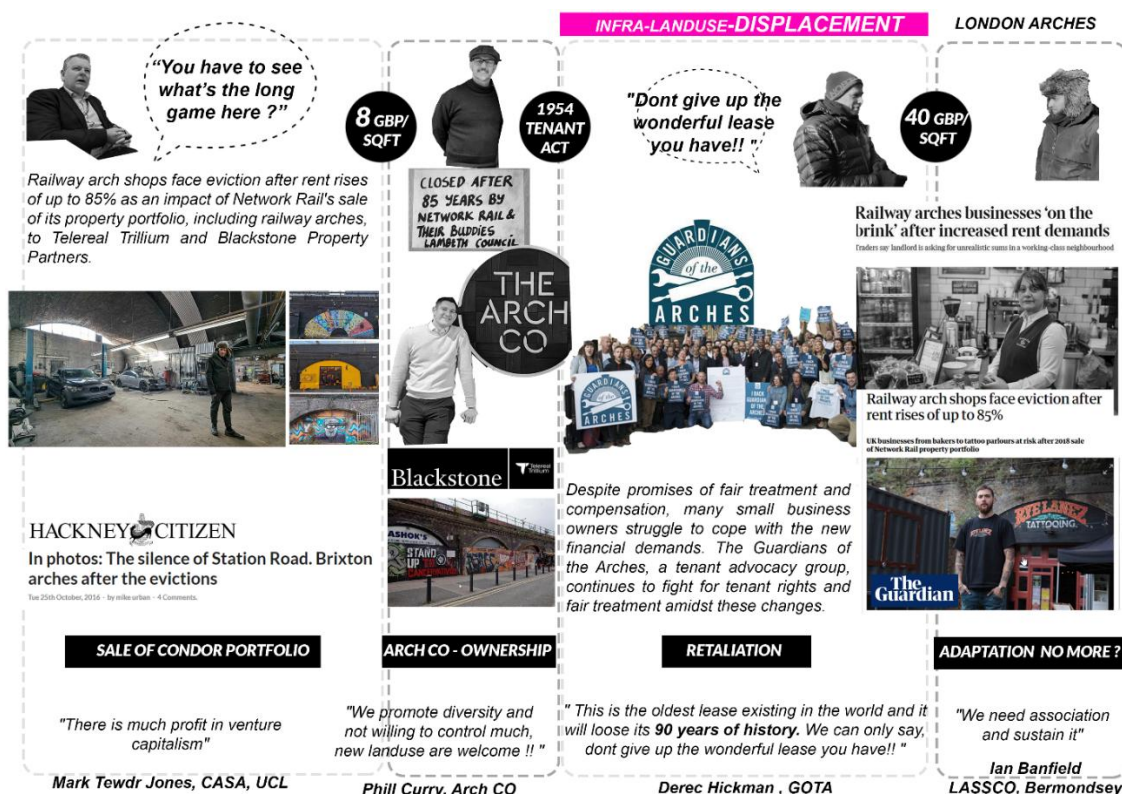

50

51

52

**Supplementary Figure 05: Land use evolution in IRS of London Railway Arches, Transcribed Interviews are available upon request.**



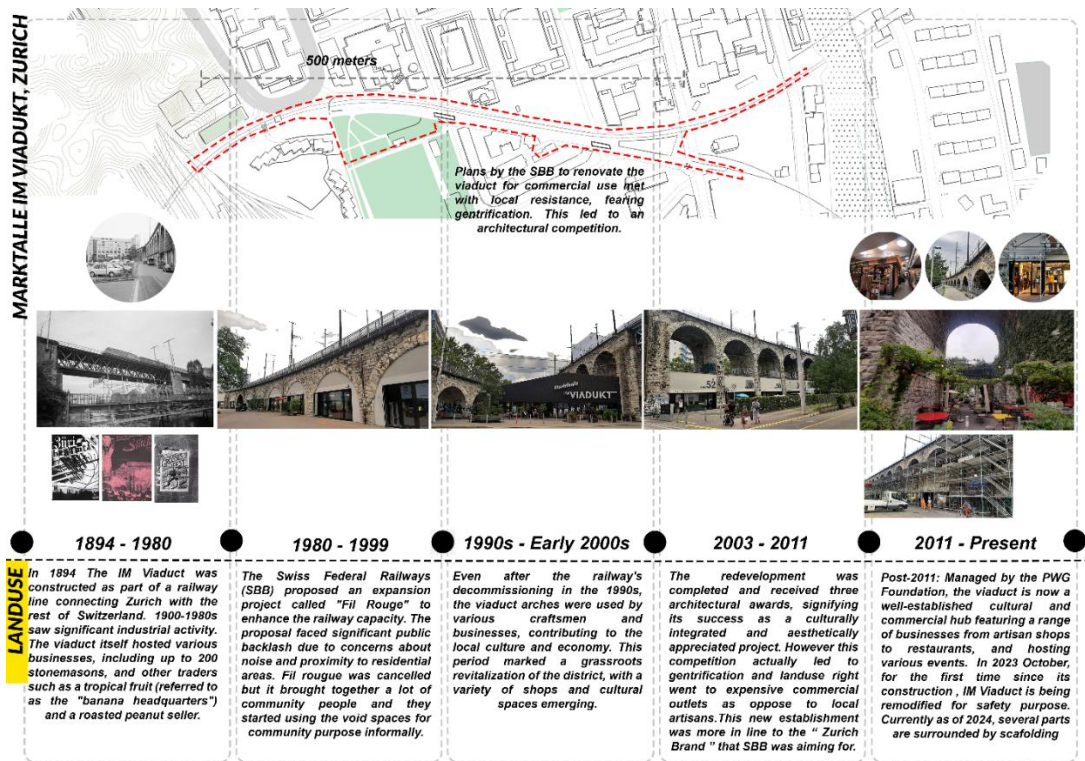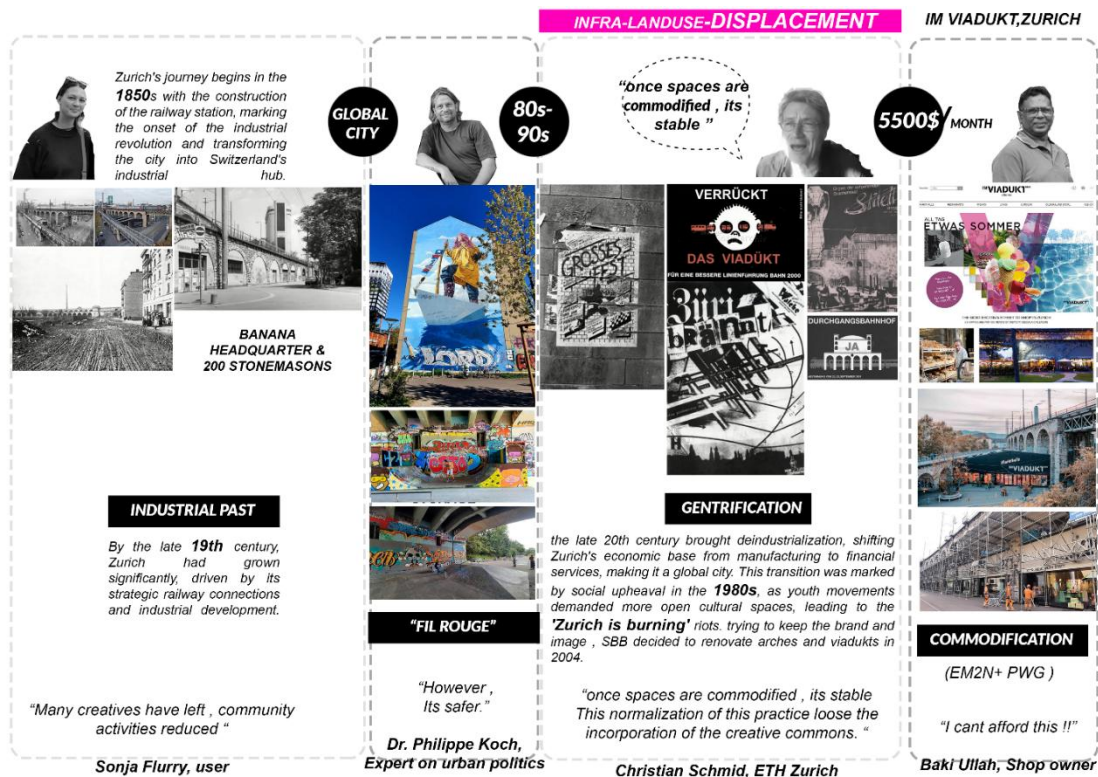

Supplementary Figure 06: Land use evolution in IRS of IM Viaduc Zurich, Transcribed Interviews are available upon request.



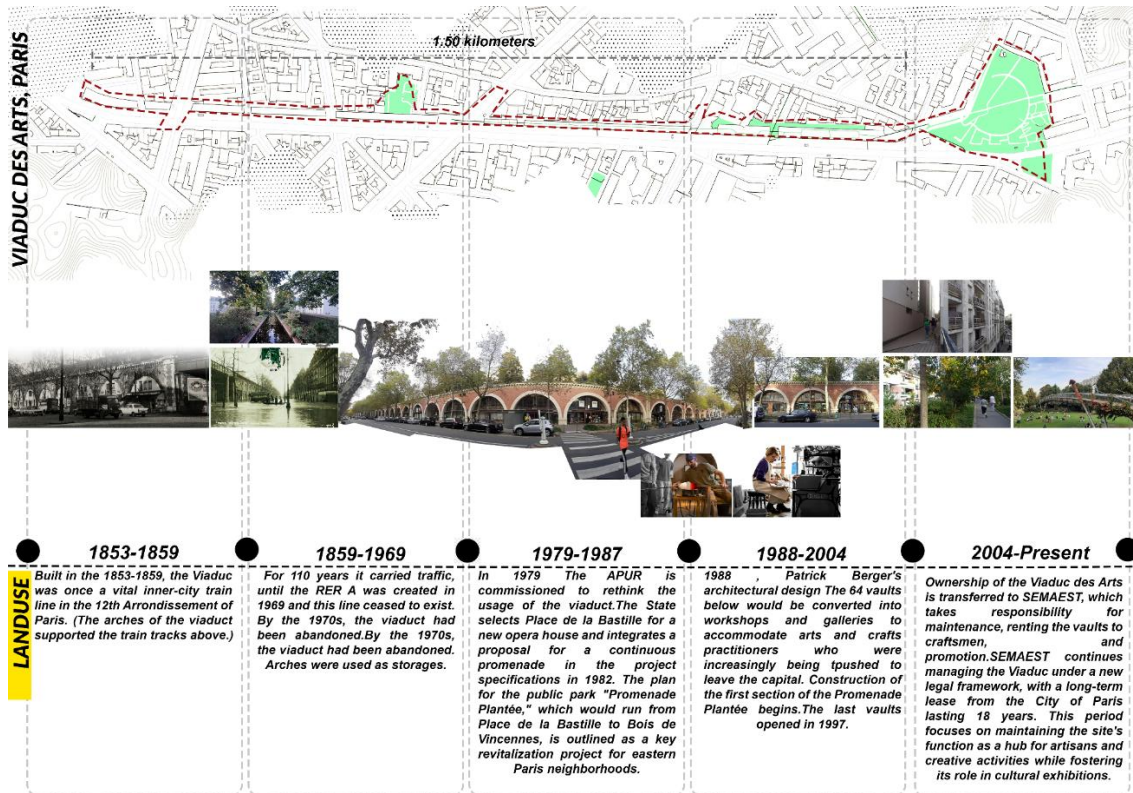

58

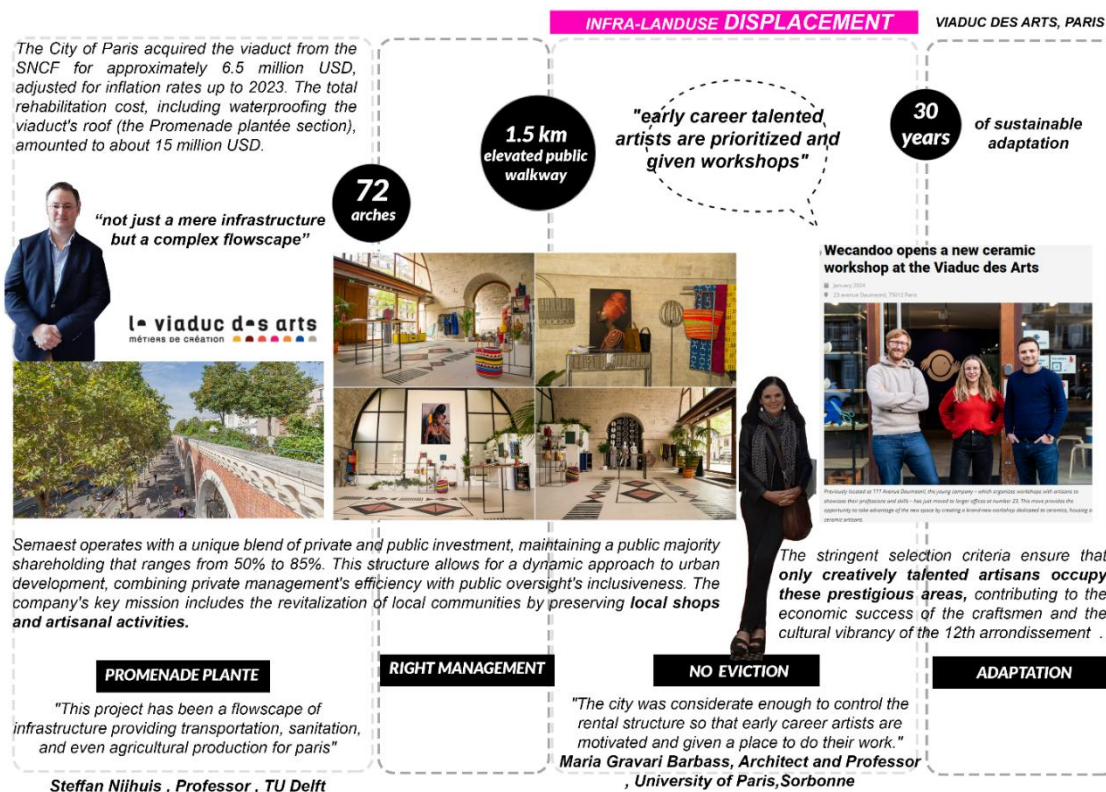

59

60

61

Supplementary Figure 07: Land use evolution in IRS of Viaduc Des Arts, Paris, Transcribed Interviews are available upon request.



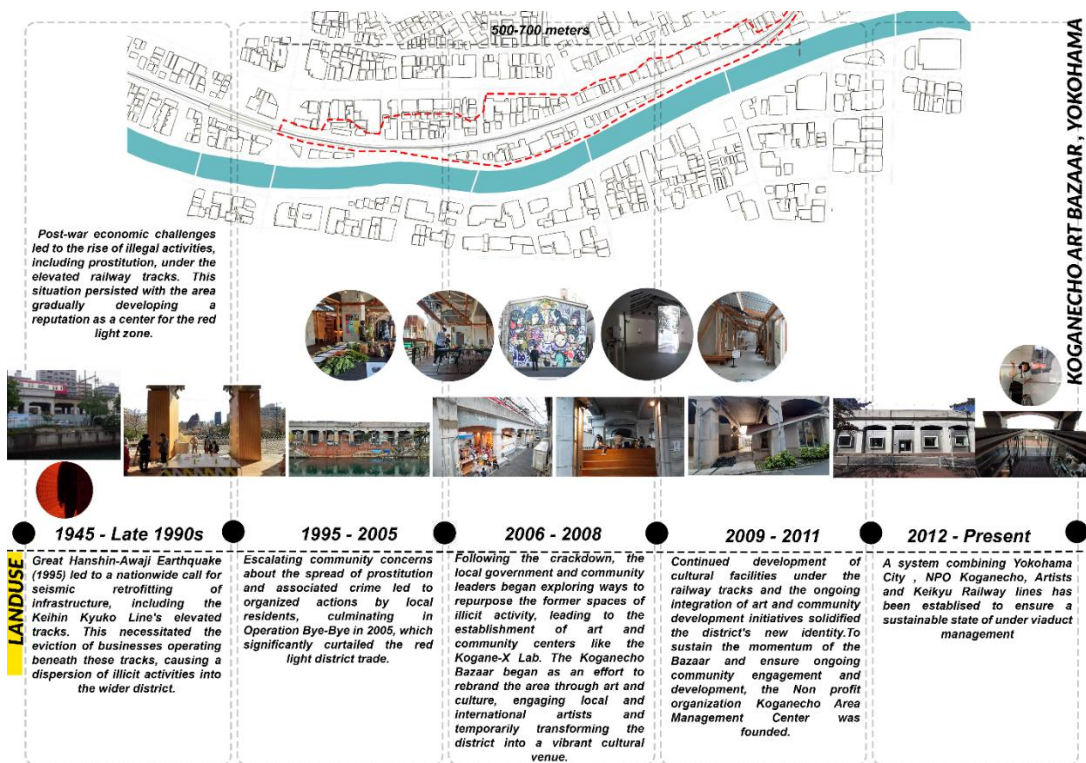

62

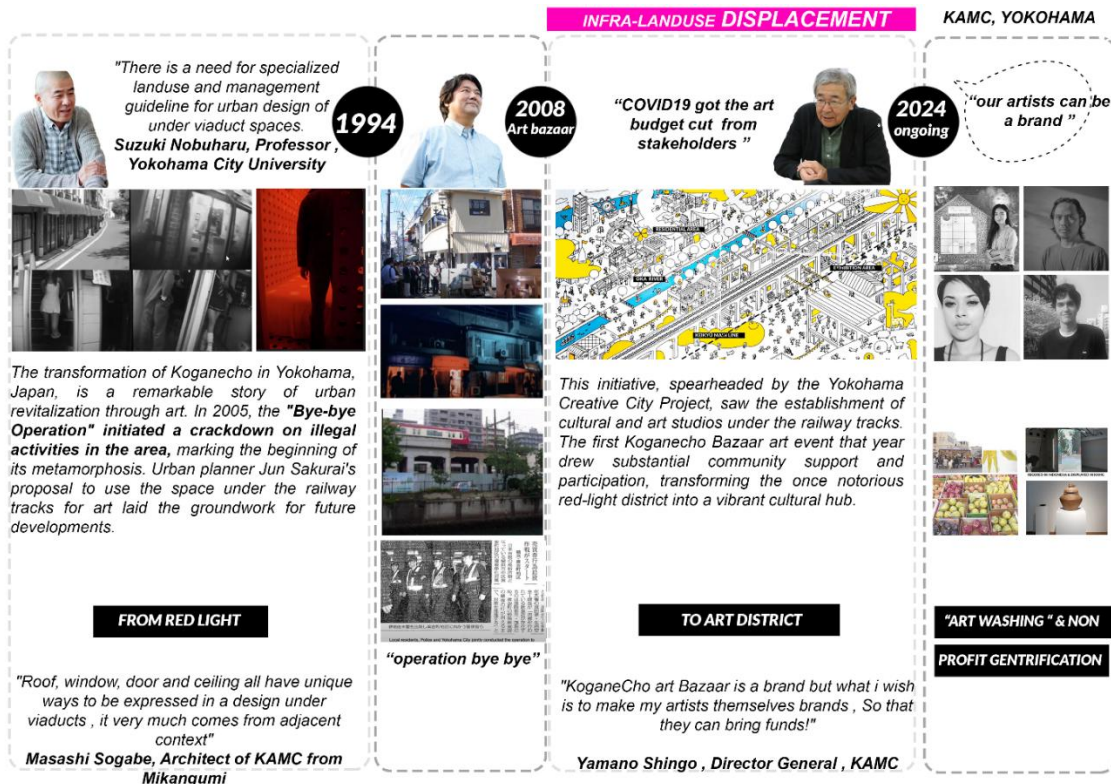

63

64

65

66

Supplementary Figure 08: Land use evolution in IRS of Kogane Cho Area Management center under Keikyu line Yokohama, Transcribed Interviews are available upon request.



# MAYOR HANIF FLYOVER, DHAKA

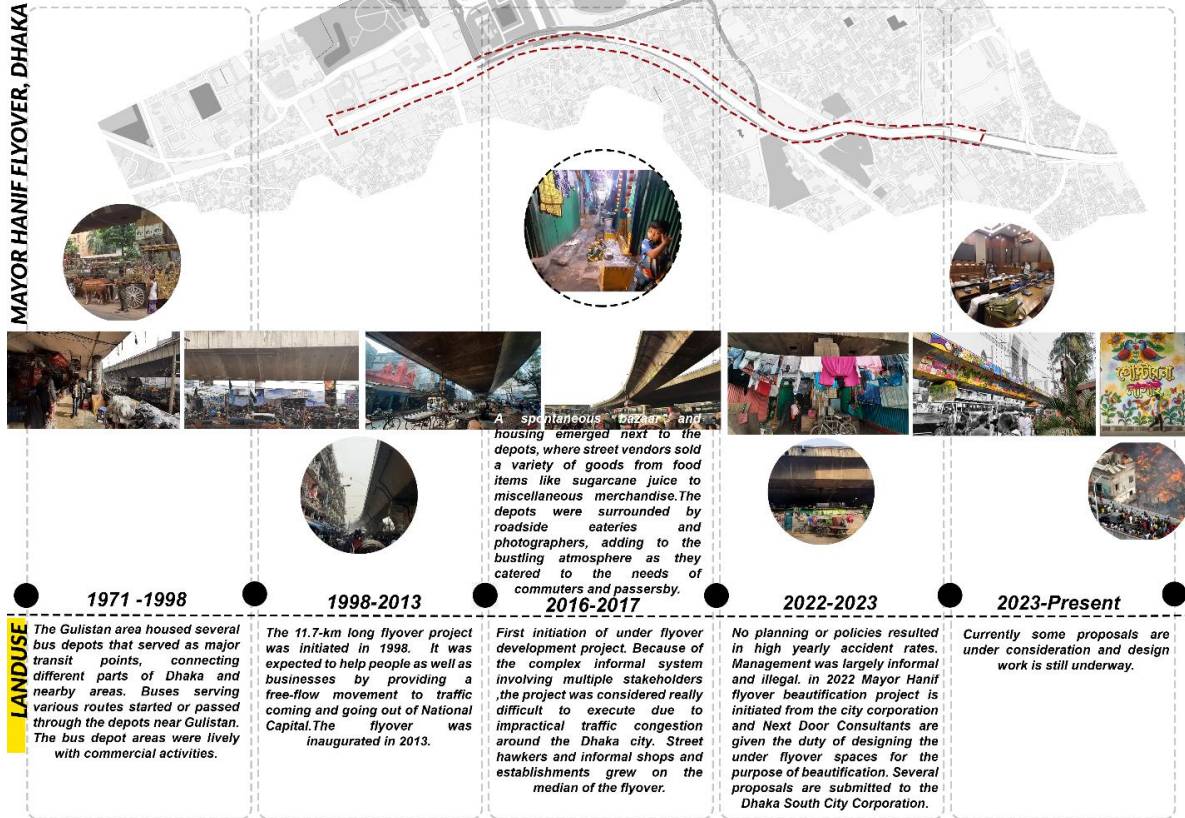

67

# TEIGAON NABISCO FLYOVER, DHAKA

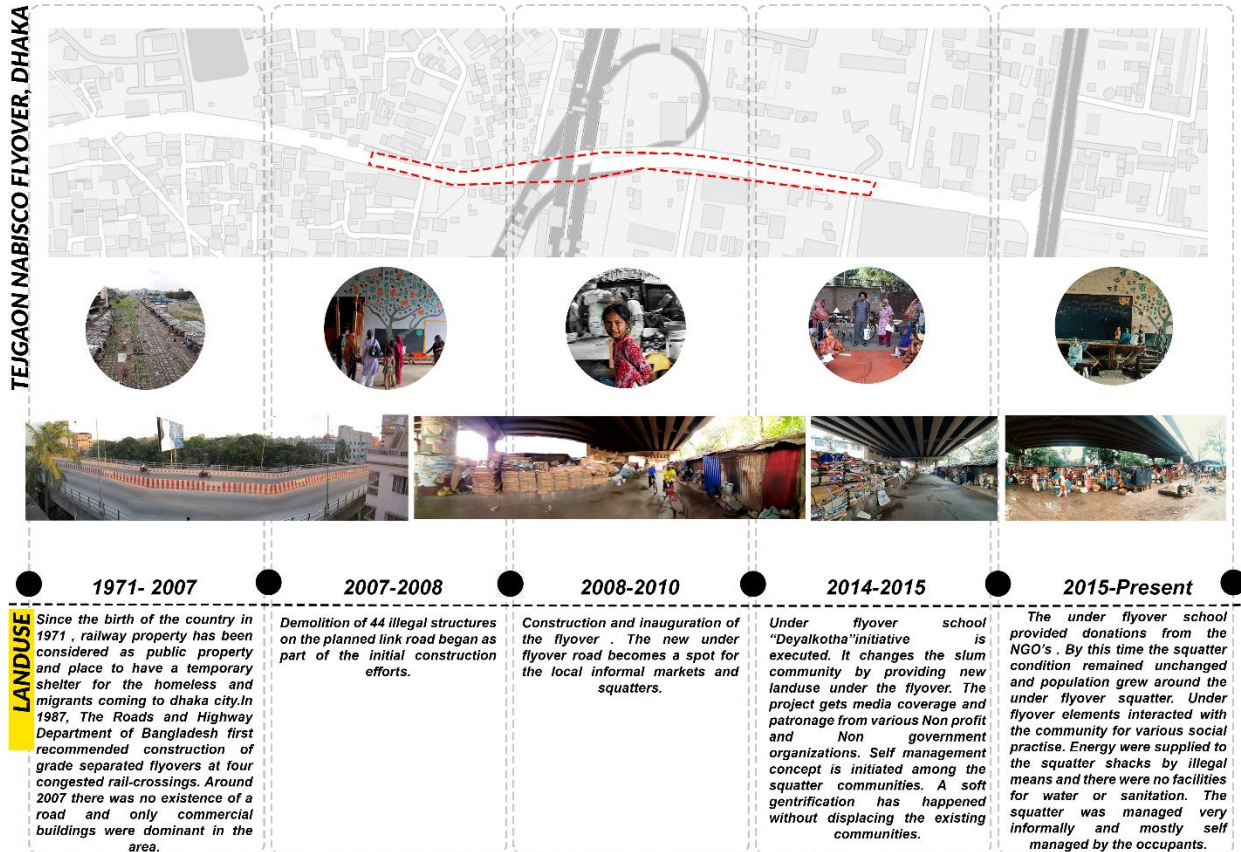

68



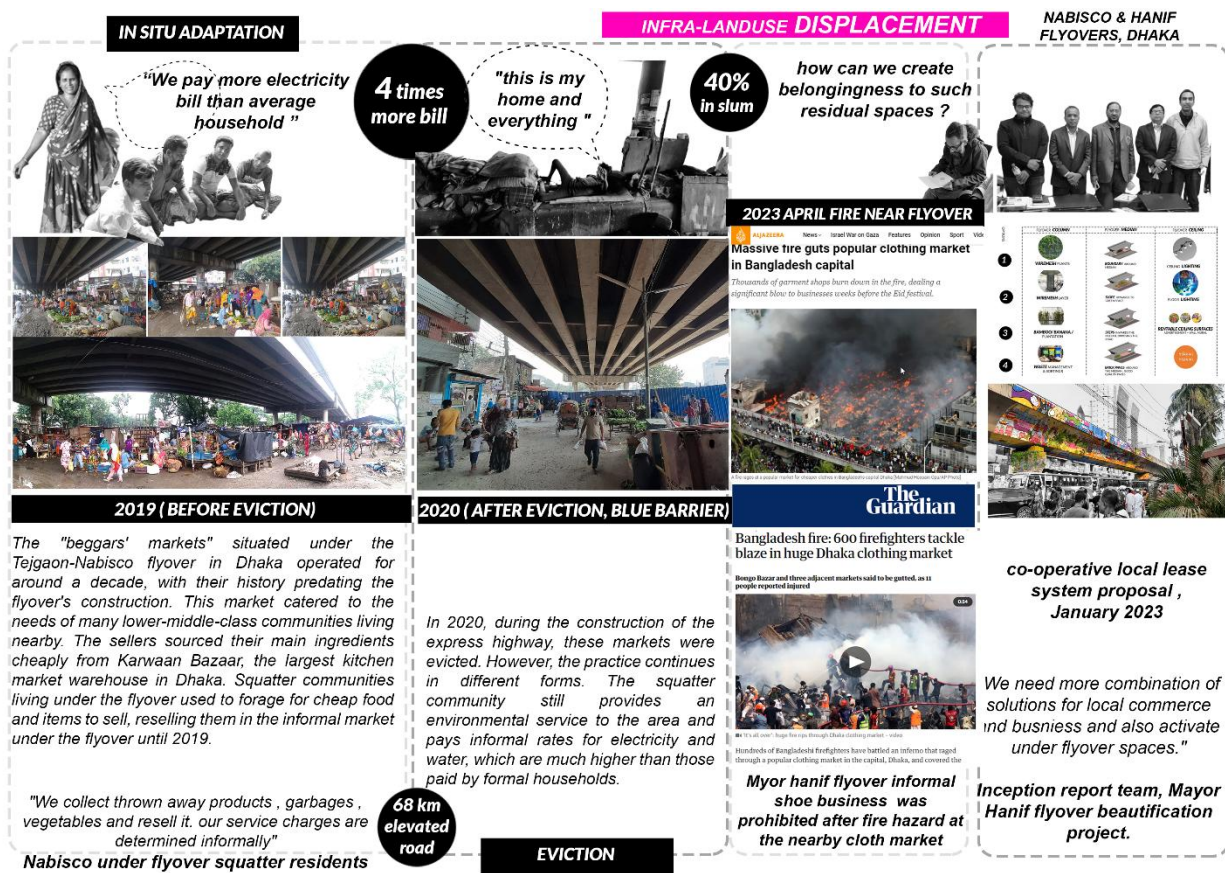

**Supplementary Figure 09: Land use evolution in IRS of Dhaka Based Flyover- 1. Mayor Hanif Flyover and 2. Tejgaon Nabisco Flyover, Dhaka**

**Supplementary video 01 link - <https://www.youtube.com/watch?v=z9aywDSGFPI>**

**Supplementary video 02 link - [https://drive.google.com/file/d/1Hv2OFXrSb9cVjIOiA\\_AdKbWypAZw1dN/view](https://drive.google.com/file/d/1Hv2OFXrSb9cVjIOiA_AdKbWypAZw1dN/view)**

**Supplementary Audio interviews 1-25 are available on request.**
